# Supplementary material for: An exploratory survey about using ChatGPT in education, healthcare, and research
Source: PubMed Central journal article supplement (PMC10553335; doi:10.1371/journal.pone.0292216), 2023-10-05
Supplement: pone.0292216.s001.pdf [file pone.0292216.s001.pdf]

## **S1 File. Survey delivered via Slido.**

### **1. What's your current role?**

- Medical Student, Resident, Fellow
- Graduate Student, Postdoc Researcher
- Clinical Faculty
- Research Faculty
- Administrative Staff
- Other

### **2. Have you used ChatGPT?**

- Yes
- No

### **3. How interested are you in using ChatGPT in your day to day work?**

- To a Great Extent
- Somewhat
- Very Little
- Not at All

### **4. Can ChatGPT be used in education?**

- No, it should be banned
- Yes, it should be actively incorporated
- I don't know, it is too early to make a statement

### **5. Can ChatGPT be used for science?**

- No, it should not be used at all
- Yes, but it should only be used to help brainstorm
- Yes, as long as its use is transparently disclosed
- Yes, disclosure is NOT needed
- I don't know, it is too early to make a statement

### **6. Can ChatGPT be used in healthcare?**

- No, it should not be used at all
- Yes, it can only be used to help write administrative content such as emails to insurance companies or to patients
- Yes, it can be used for any purpose
- I don't know, it is too early to make a statement

### **7. Using one keyword, describe challenges of using ChatGPT**

### **8. Using one keyword, describe benefits of using ChatGPT**
